# Supplementary material for: Role of inorganic cations in the excitonic properties of lead halide perovskites
Source: Royal Society of Chemistry journal article supplement (doi:10.1039/d2cp04288f), 2022-12-09
Supplement: d2cp04288f1.pdf [file d2cp04288f1.pdf]

Supporting Information

# Role of Inorganic Cations in the Excitonic Properties of Lead Halide Perovskites

Małgorzata Wierzbowska<sup>1</sup> and Juan José Meléndez<sup>2,3</sup>

<sup>1</sup> *Institute of High Pressure Physics, Polish Academy of Sciences, Sokółowska 29/37, 01-142 Warsaw, Poland*

<sup>2</sup> *Department of Physics, University of Extremadura, Avenida de Elvas, s/n, 06006 Badajoz, Spain*

<sup>3</sup> *Institute for Advanced Scientific Computing of Extremadura (ICCAEX), Avenida de Elvas, s/n, 06006 Badajoz, Spain*

## SUPPLEMENTARY RESULTS

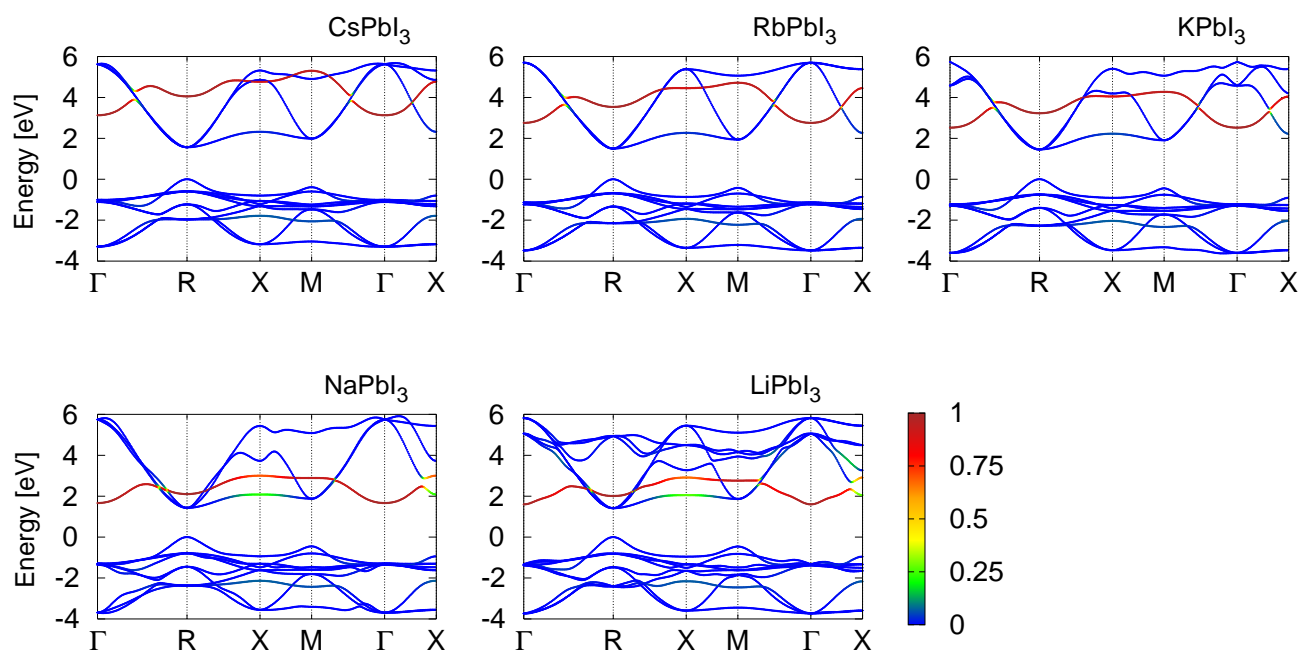

FIG. S1. DFT band structures of APbI<sub>3</sub> perovskites with A = Cs, Rb, K, Na, Li. Bands projected at MLWFs located at the A<sup>+</sup> cation empty states are in red according to the legend, which is common for all cases.

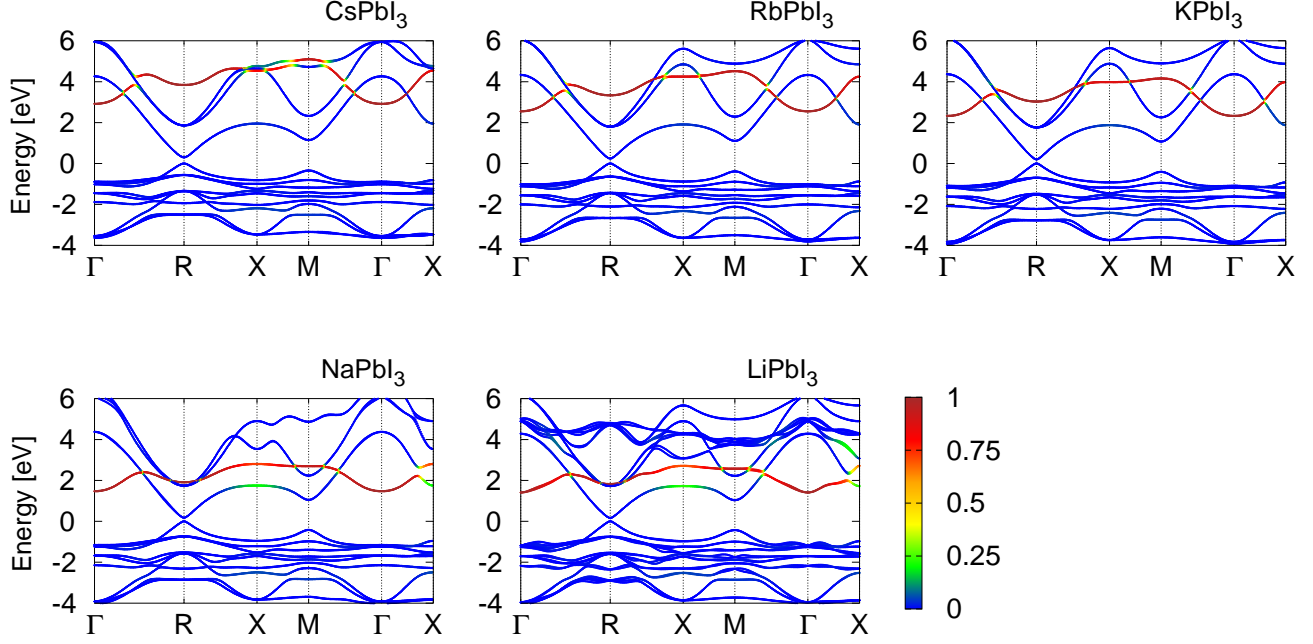

FIG. S2. Same as Fig. S1 within DFT+SOC

TABLE S1. Characterization of the DFT and DFT+SOC band structures for  $\text{APbI}_3$  with  $A = \text{Cs, Rb, K, Na and Li}$ .  $E_g^R$  and  $E_g^\Gamma$  are the bandgaps at  $R$  and  $\Gamma$ , respectively,  $\Delta^{CBM-R}$  and  $\Delta^{CBM-\Gamma}$  are the differences between the CBM and the  $A^+$ -band at  $R$  and  $\Gamma$ , respectively,  $W_A$  is the band width of the  $A^+$  cation empty states and  $a$  is the optimized lattice constant (in  $\text{\AA}$ ). All energies are given in eV.

| A       | $E_g^R$ | $E_g^\Gamma$ | $\Delta^{CBM-R}$ | $\Delta^{CBM-\Gamma}$ | $W_A$ | $a$   |
|---------|---------|--------------|------------------|-----------------------|-------|-------|
| DFT     |         |              |                  |                       |       |       |
| Cs      | 1.57    | 4.14         | -2.48            | -1.56                 | 2.10  | 6.379 |
| Rb      | 1.50    | 3.90         | -2.03            | -1.25                 | 1.86  | 6.327 |
| K       | 1.46    | 3.75         | -1.77            | -1.06                 | 1.77  | 6.295 |
| Na      | 1.43    | 2.96         | -0.67            | -0.23                 | 1.34  | 6.279 |
| Li      | 1.42    | 2.93         | -0.60            | -0.19                 | 1.31  | 6.259 |
| DFT+SOC |         |              |                  |                       |       |       |
| Cs      | 0.30    | 3.81         | -3.54            | -2.61                 | 2.10  | 6.379 |
| Rb      | 0.24    | 3.57         | -2.94            | -2.31                 | 1.86  | 6.327 |
| K       | 0.20    | 3.42         | -2.82            | -2.12                 | 1.74  | 6.295 |
| Na      | 0.17    | 2.63         | -1.73            | -1.30                 | 1.33  | 6.279 |
| Li      | 0.16    | 2.60         | -1.66            | -1.25                 | 1.30  | 6.259 |

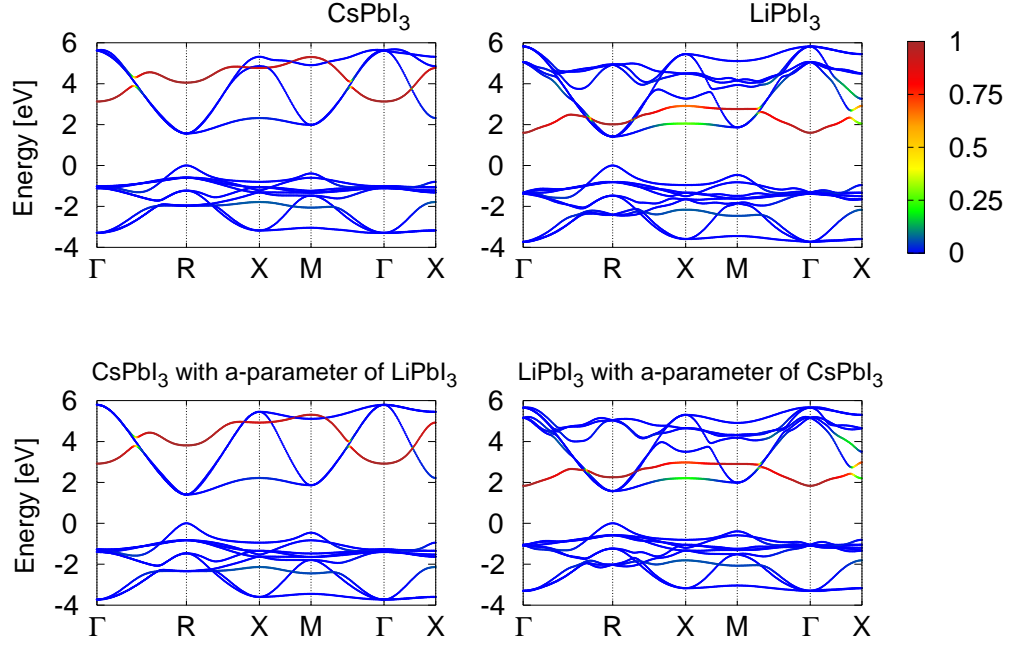

FIG. S3. DFT band structures of  $\text{APbI}_3$  perovskite with  $\text{A} = \text{Cs}$  and  $\text{Li}$ , in their optimized geometries, are compared with bands of the same cases calculated with the lattice constants of the opposite case. As before, bands projected at MLWFs located at the  $\text{A}^+$  cation empty states are in red, according to the legend.

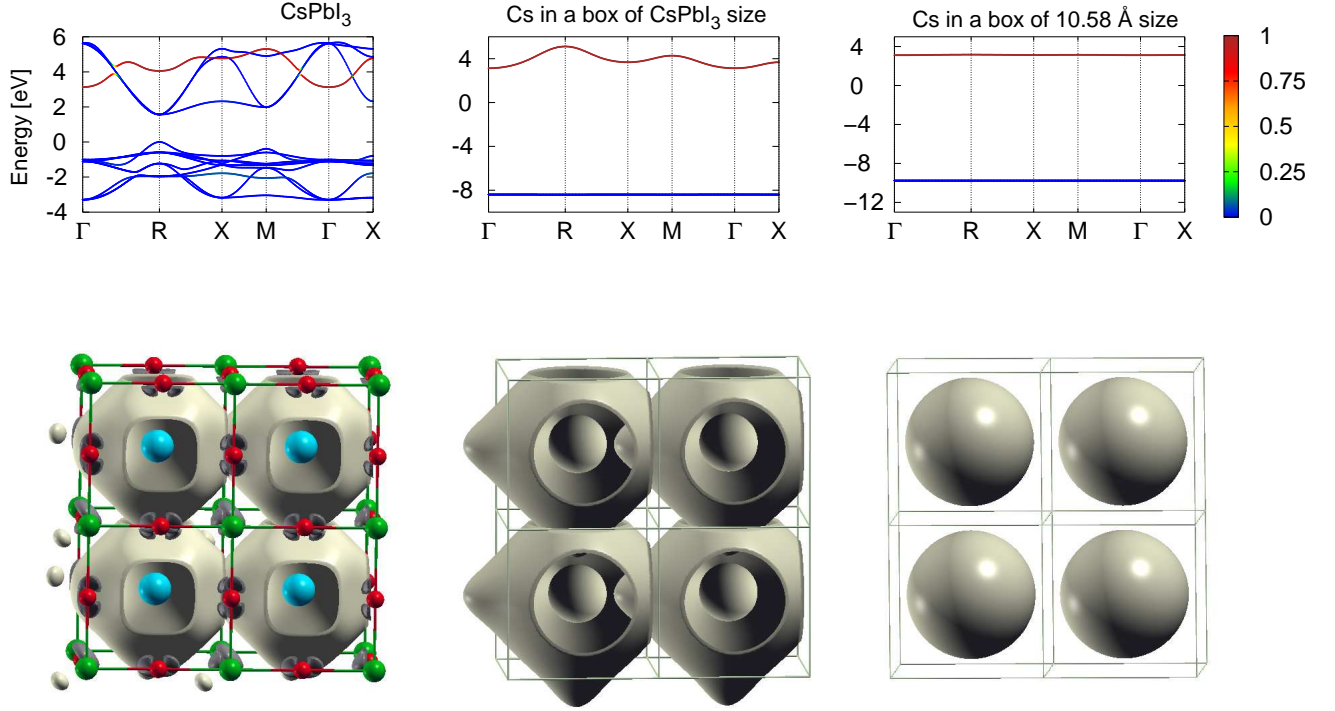

FIG. S4. DFT band structures for CsPbI<sub>3</sub> (left) and isolated Cs<sup>+</sup> in periodic structures with lattice constants 6.38 Å (equal to that of CsPbI<sub>3</sub>, center) and 10.58 Å (right). Bands are projected onto the *s*-type MLWF located at the Cs<sup>+</sup> cation. For the calculations for pure cations, a compensating negative charge background has been used. Below each case, the MLWFs used for the bands projection are plotted; the isosurface is set to 5 for all cases. The MLWFs spreading for CsPbI<sub>3</sub> and Cs<sup>+</sup> in the small and large lattices are 9.91, 10.07 and 7.11 Å<sup>2</sup>, respectively.

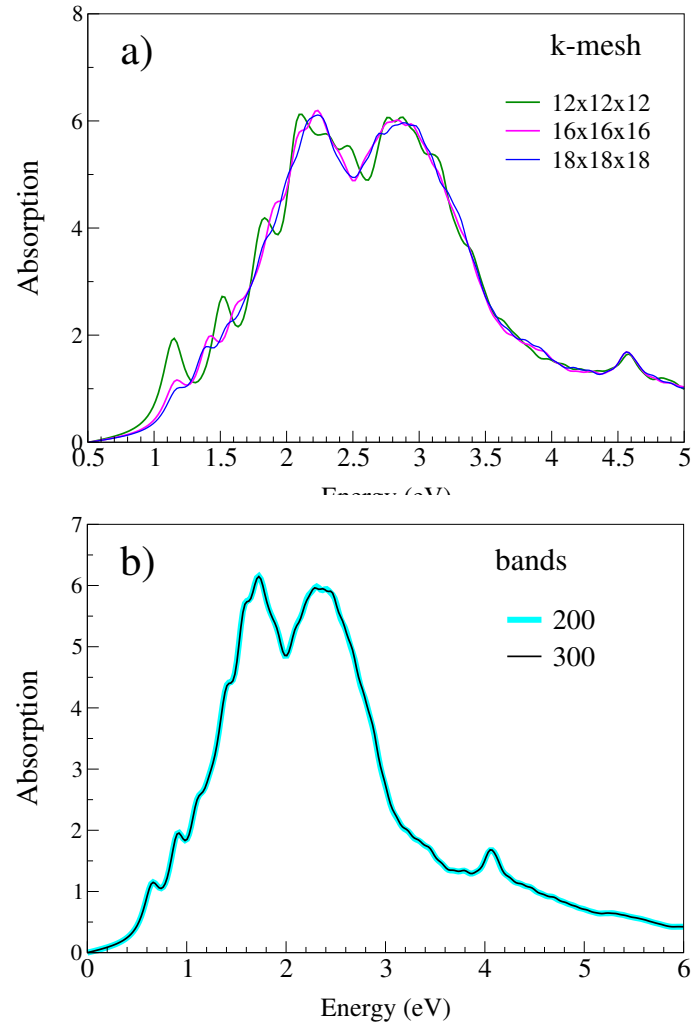

FIG. S5. *a*) Absorption spectra of CsPbI<sub>3</sub> calculated from the BSE using different samplings of the BZ. *b*) Convergence test of the BSE solution with respect to the number of bands (using  $k$ -mesh 16×16×16).
